# Supplementary material for: Gram-scale synthesis of high-purity graphene quantum dots with multicolor photoluminescence
Source: Royal Society of Chemistry journal article supplement (doi:10.1039/c5ra19219f), 2015-01-01
Supplement: c5ra19219f1.pdf [file c5ra19219f1.pdf]

## Supplementary Information

### Gram-scale synthesis of high-purity graphene quantum dots with multicolor photoluminescence

Fuchi Liu,<sup>a,b</sup> Yuanyuan Sun,<sup>a</sup> Yongping Zheng,<sup>a</sup> Nujiang Tang,<sup>\*a</sup> Ming Li,<sup>a</sup> Wei Zhong<sup>a</sup> and Youwei Du<sup>a</sup>

<sup>a</sup> Nanjing National Laboratory of Microstructures & Collaborative Innovation Center of Advanced Microstructures, Nanjing University, Nanjing 210093, People's Republic of China

<sup>b</sup> College of Physics and Technology, Guangxi Normal University, Guilin 541004, People's Republic of China

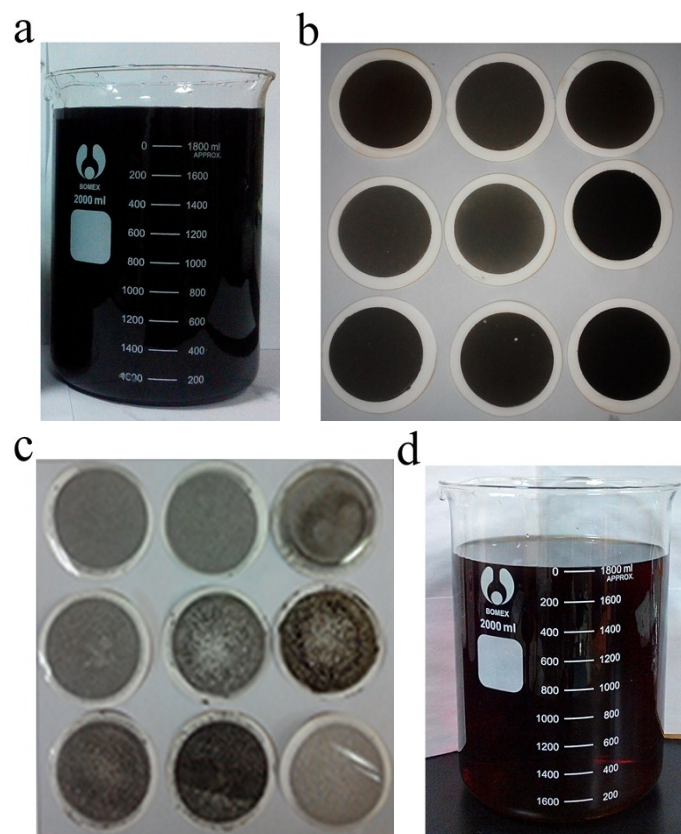

**Fig. S1 The sample solution and obtained particles on microporous membranes.** (a) and (d) are sample solution before and after filtration, respectively. (b) and (c) are obtained particles on 220-, and 25-nm microporous membrane, respectively.
